# Supplementary material
Source: MDPI journal article supplement (https://www.mdpi.com/1424-2818/13/12/677)
Supplement: s1 [file s1]

## Supplementary materials

Table S1: PCR primers used in this study.

| PRIMER NAME         | SEQUENCE 5'→3'             |
|---------------------|----------------------------|
| <i>SnEcRDegF</i>    | TTGTAAAGGNGTRTTCAGGCSGAG   |
| <i>SnEcRDegR</i>    | CGGCAGTTNCCRGTTSBTCAGCTTC  |
| <i>SnUSPDegF</i>    | ATGTCGCCATGTCNCCDCCBGARATG |
| <i>SnUSPDegR</i>    | GAGTTNCGGTGCAGGNTCATGC     |
| <i>T7RNAPolProm</i> | TAATACGACTCACTATAGGG       |
| <i>TubF</i>         | GAGCAGTTCACCGCTATGTTCC     |
| <i>TubR:</i>        | GGTGTGAGTGCTTTAGTTGTCC     |
| <i>SnEcRRTF</i>     | AGAGGGAAAAAGACAAGTTACCAG   |
| <i>SnEcRF</i>       | AGATTACATTATTAAAGGCGTGCTC  |
| <i>SnEcRR</i>       | GAGATGCACATGTTGGAGTTCTGC   |
| <i>SnUSPConF</i>    | CTAAGTGGTTCCAAGCATCTCTG    |
| <i>SnUSPConR</i>    | GAGTTACGGTGCAGGGTCATGC     |
| <i>OligodT</i>      | GTCGACCTCGAG(T17)          |
| <i>SnEcRF:</i>      | AGATTACATTATTAAAGGCGTGCTC  |
| <i>SnEcRR</i>       | GAGATGCACATGTTGGAGTTCTGC   |

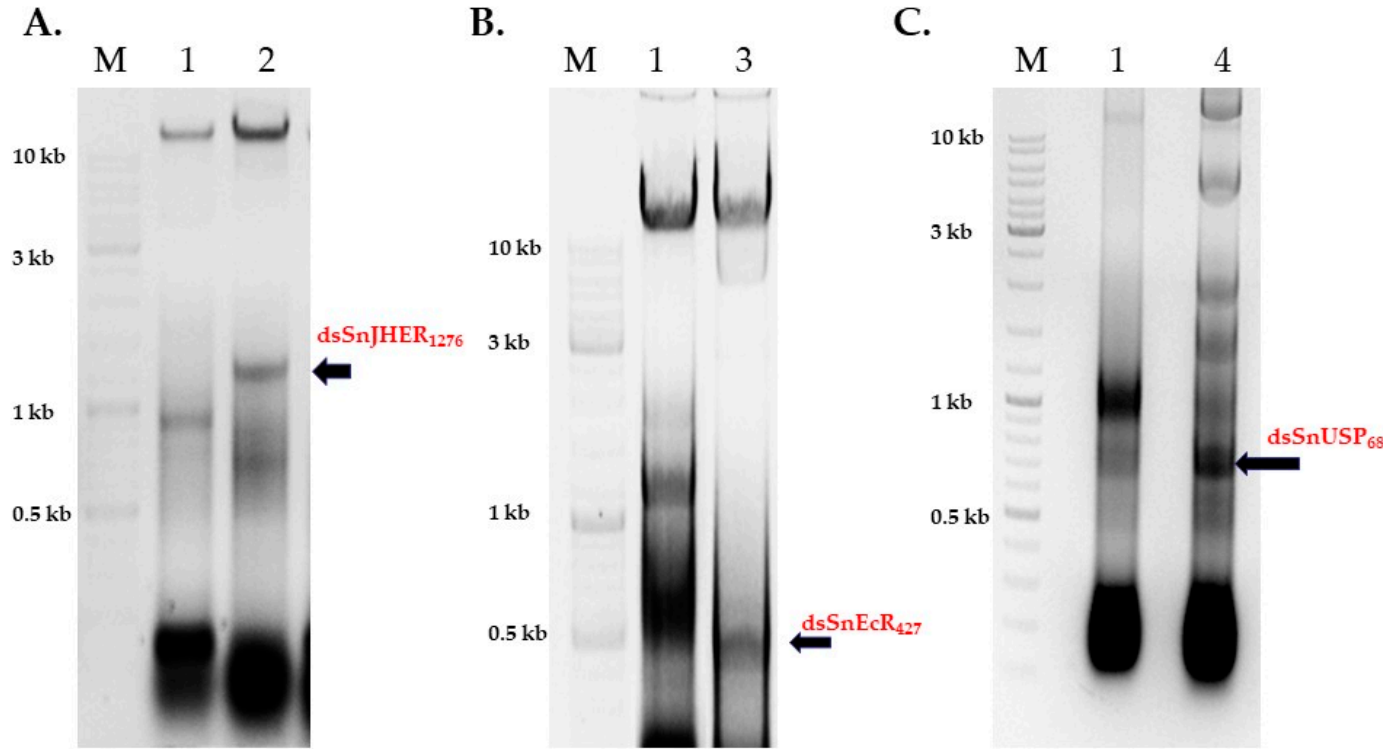

M: Marker

1: L4440 +IPTG

2: L4440-SnJHER<sub>1276</sub> +IPTG

3: L4440- SnEcR<sub>427</sub> +IPTG

4: L4440- SnUSP<sub>689</sub> +IPTG

**Figure S1.** Production of SnJHER<sub>1276</sub>, SnEcR<sub>427</sub> and SnUSP<sub>689</sub> dsRNAs in HT115 cells. **A.** Total RNA isolated from L4440 or L4440-SnJHER<sub>1276</sub>-transformed and IPTG induced HT115 bacteria, **B.** Total RNA isolated from L4440 or L4440- SnEcR<sub>427</sub>-transformed and IPTG induced HT115 bacteria and **C.** Total RNA isolated from L4440 or L4440- SnUSP<sub>689</sub>-transformed and IPTG induced HT115 bacteria, analyzed in 1% w/v agarose gels. **M:** Molecular marker. Unspecific dsRNA products of the empty L4440 plasmid can be observed in ~1 kb.
